# Supplementary material for: Development of Chitosan-Based Surfaces to Prevent Single- and Dual-Species Biofilms of Staphylococcus aureus and Pseudomonas aeruginosa
Source: MDPI journal article supplement (doi:10.3390/molecules26144378), 2021-07-20
Supplement: s1 [file s1]

## Supplementary material

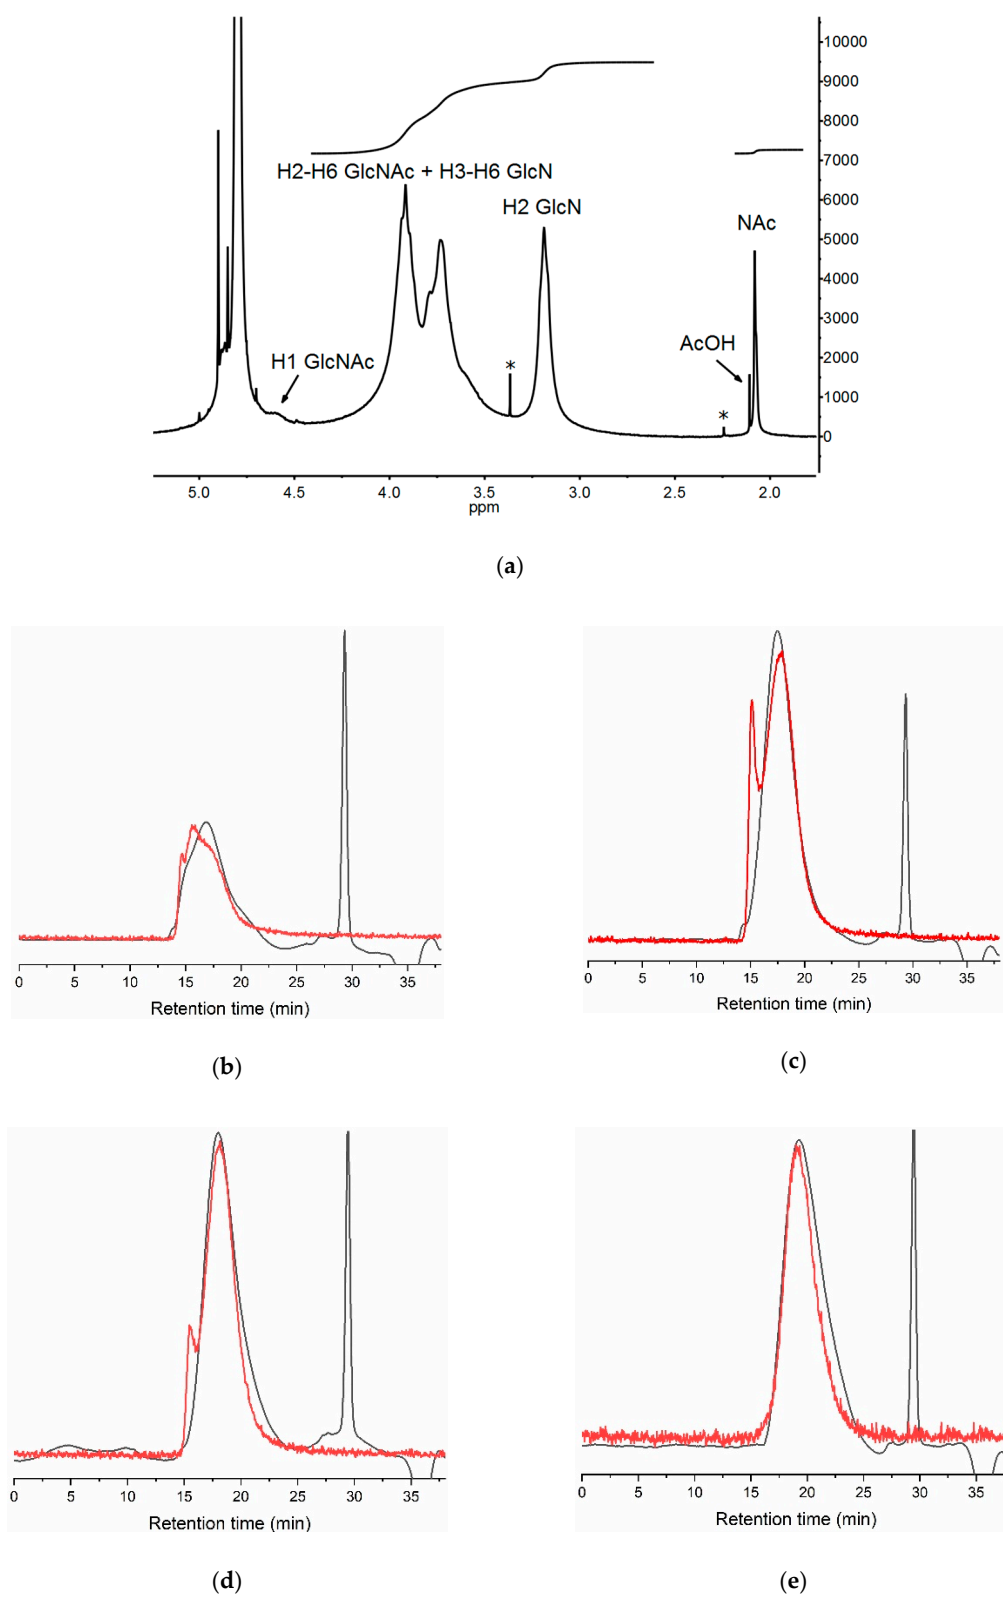

**Figure S1.**  $^1\text{H}$  NMR spectrum (a) and gel permeation eluogram (b) of native chitosan from the pen of *Loligo opalescens* squid (weight average molecular weight (Mw) 294 kDa; polydispersity index (PDI) 1.428); eluograms of depolymerized chitosan: CS1, Mw 186 kDa, PDI 1.349 (c); CS2, Mw 129 kDa, PDI 1.534 (d); CS3, Mw 61 kDa, PDI 1.669 (e).

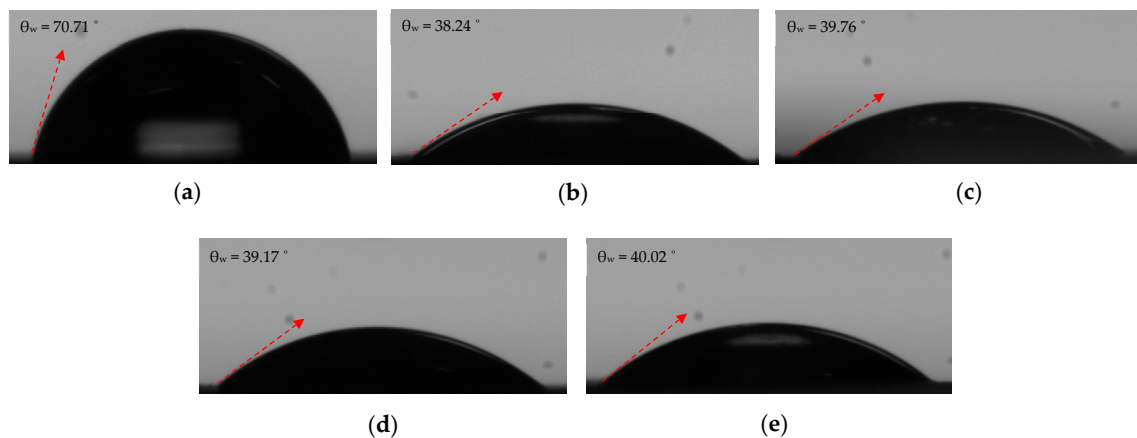

**Figure S2.** Representative images of water droplets and corresponding contact angles on (a) PLA and CS-coated PLA surfaces; (b)  $\beta$ -CS-PLA; (c) CS1-PLA; (d) CS2-PLA; and (e) CS3-PLA. The results shown in Table 1 resulted from the average of the angles of several drops of water released onto each of the tested surfaces.

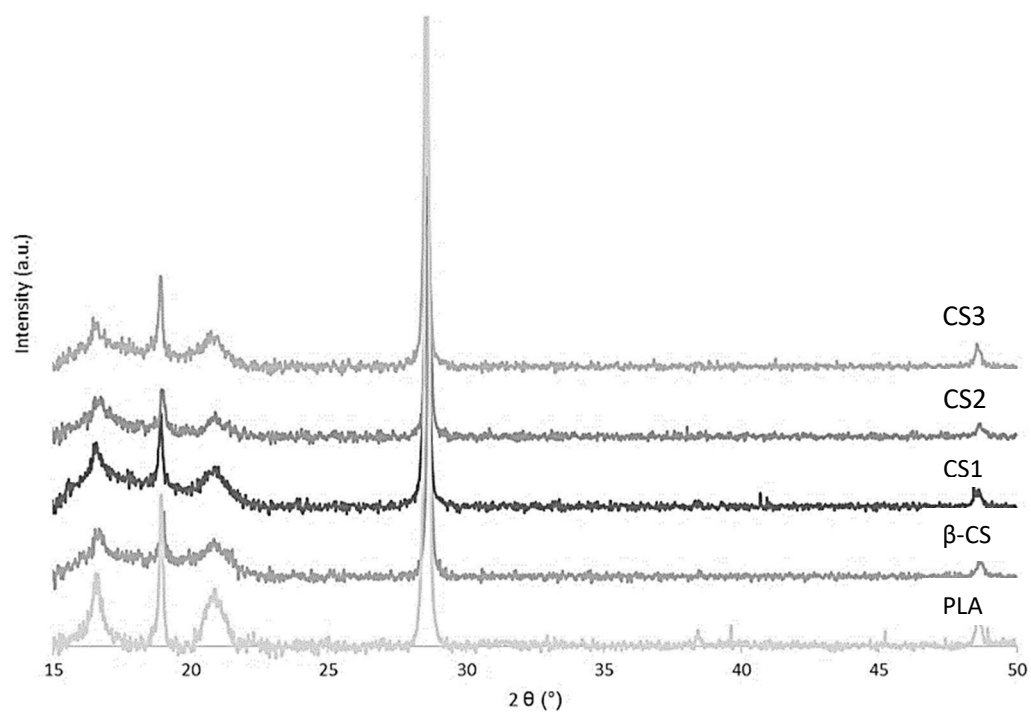

**Figure S3.** X-ray diffraction (XRD) patterns of different types of chitosan immobilized onto PLA surface (CS3 (1), CS2 (2), CS1 (3), and  $\beta$ -CS (4)) and of PLA film (5).

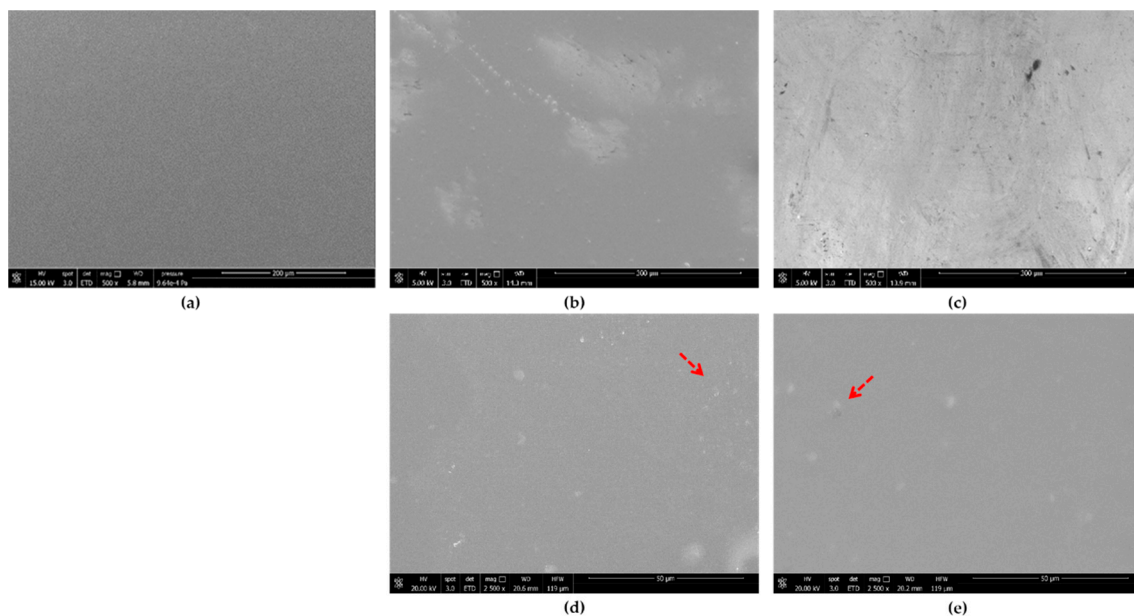

**Figure S4.** Scanning electron microscopy images of PLA (a) and PLA films coated with the highest (b, d,  $\beta$ -CS) and lowest (c, e, CS3) molecular weight chitosan at a magnification of 500 $\times$  (a–c) and 2500 $\times$  (d,e). The red arrows point to small aggregates visible on CS-PLA surfaces.

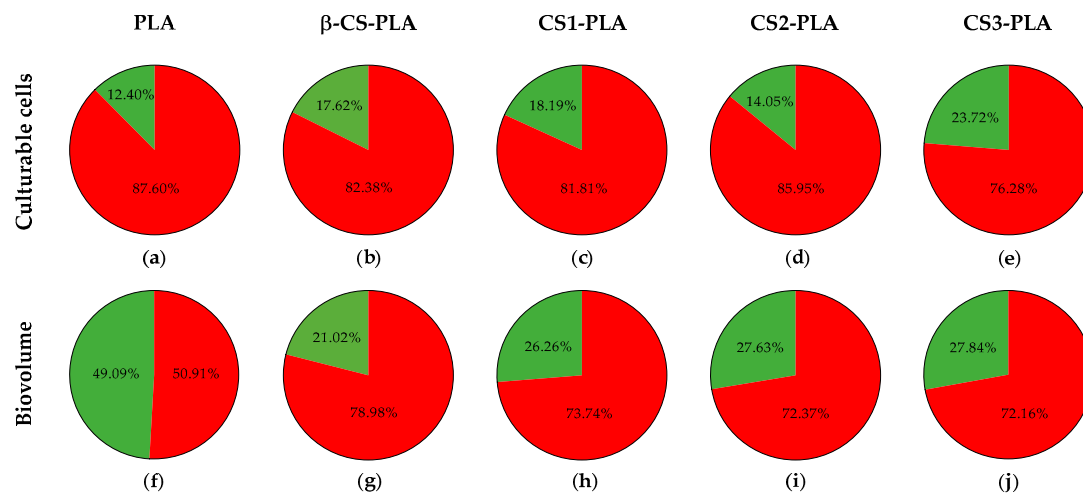

**Figure S5.** Proportion of *S. aureus* (in green) and *P. aeruginosa* (in red) (a–e) culturable cells and (f–j) biovolume in dual-species biofilms formed on PLA and CS-PLA surfaces.

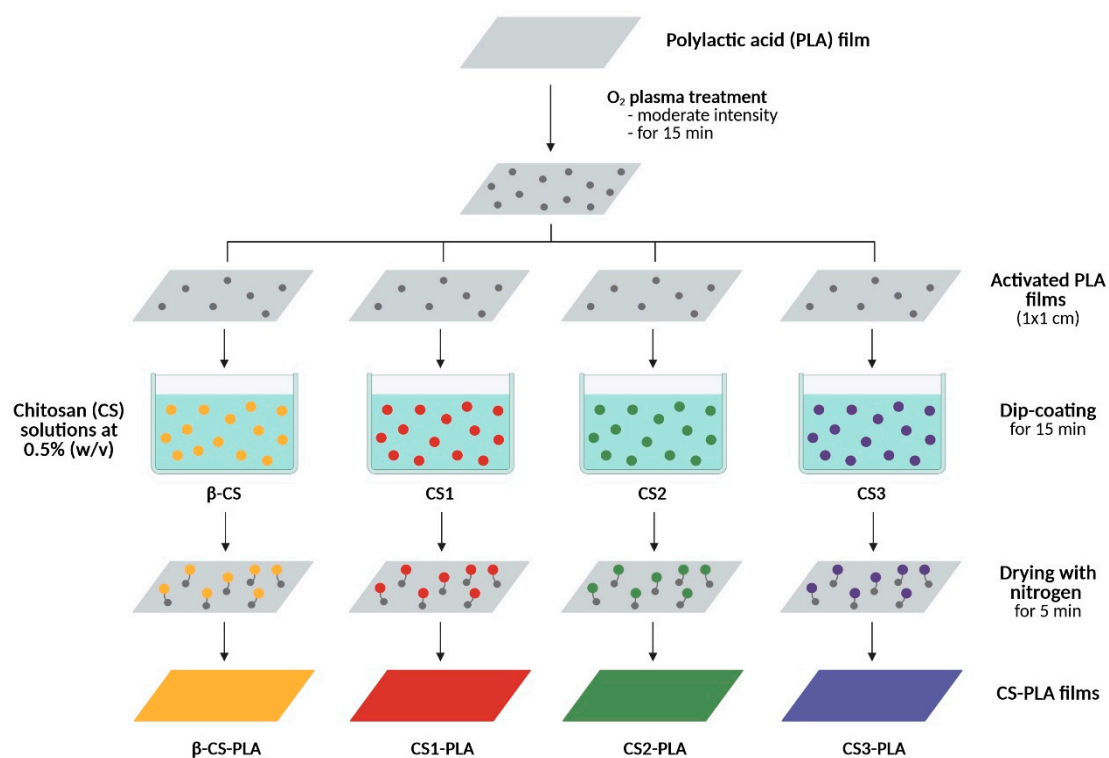

**Figure S6.** Representative scheme of the functionalization of PLA surfaces with different molecular weights chitosan ( $\beta$ -CS, CS1, CS2, and CS3).

**Table S1.** Properties of PLA films from the supplier report.

|                                  |      |
|----------------------------------|------|
| Elongation at break (%)          | 6    |
| Tensile modulus (GPa)            | 3    |
| Tensile strength (MPa)           | 53   |
| Density (g.cm <sup>-3</sup> )    | 1.24 |
| Thermal properties -1.8 MPa (°C) | 55   |
